# Supplementary material
Source: publisher figshare collection journal article supplement (https://tandf.figshare.com/articles/dataset/_/20132006)
Supplement: Supplementary file 1 [file 1]

|                                                                                                                              | Por | VA | VRMp             | SV                    | VO  | VTD           | VTD-E     | VTD-L    | PP  | IPD    | VEL                | TYL | RC        | RW        | RH       | R-S/U     | R-mm        | APD               | APC  | Age           |
|------------------------------------------------------------------------------------------------------------------------------|-----|----|------------------|-----------------------|-----|---------------|-----------|----------|-----|--------|--------------------|-----|-----------|-----------|----------|-----------|-------------|-------------------|------|---------------|
| <i>Paradiospyroxylon kvacekii</i> nov. gen. et sp. (holotype DR 23)                                                          | SR  | R  | rare up to 3     | 86 <span> </span> %   | R–P |               | 56–89–128 | 16–29–40 | Si  | 3–5    | 200–300–400        | A   | Het       | 1–3(4)    | 1–52     | 1–10(11)  | 10–15       | D–DA, SP          | 4–11 | Oli           |
| Apocynaceae                                                                                                                  |     |    |                  |                       |     |               |           |          |     |        |                    |     |           |           |          |           |             |                   |      |               |
| <i>Apocynaceoxylon mohgaoense</i> Chitaley, Paradkar and Subnedar (Chitaley et al. 1970)                                     | D   | ND | 2–5              | ?                     | ?   | ?             |           |          | Si  | ?      | ?                  | ?   | ?         | ?         | ?        | ?         | ?           | D, V              | ?    |               |
| <i>Apocynoxylon sapotaceoides</i> Crawley (Crawley 2001)                                                                     | D   | R  | 2–12             | 5 <span> </span> %    | ?   | 33–81–110     |           |          | Si  | 3–4    | ?                  | ?   | Het       | 1         | 4–42     | ?         | ?           | B(–3)             | ?    | Pal/Eoc       |
| <i>Apocynoxylon sylvestris</i> Gazeau and Koeniguer (Gazeau and Koeniguer 1976)                                              | D   | R  | 2–8              | 12 <span> </span> %   | R   | 25–60         |           |          | Si  | ?      | ?                  | ?   | Het       | 1–4       | 150–180  | 1         | 10–16       | B(1–2)            | ?    | Eoc           |
| <i>Apocynoxylon?</i> <i>Oldhavense</i> Crawley (Crawley 2001)                                                                | D   | R  | 2–4              | ?                     | R   | 55–91–132     |           |          | Si  | 2–4    | ?                  | ?   | Het       | 1–5       | 4–113    | 1–3(8)    | ?           | B(1), SP–V        | ?    | Pal/Eoc       |
| <i>Aspidospermoxylon uniseriatum</i> Kruse (Kruse 1954)                                                                      | D   | ND | 2                | 'mostly'              | R   | 84–140        |           |          | Si  | 4      | 240–370            | ?   | Het       | 1–(2)     | 4–26     | ?         | 12          | ?SP               | >9   | Eoc           |
| <i>Coumoxylon hartigii</i> Gottwald (Gottwald 1976)                                                                          | D   | ND | 2–3(5)           | ?                     | R   | 40–70–120     |           |          | Si  | 3–4–5  | 180–480            | ?   | Hom       | 1–(2)     | 5–18     | -         | ?           | AD, (B)           | ?    | mEoc          |
| <i>Euholarrhenoxylon aisenense</i> Gros (Gros 1993)                                                                          | D   | ND | 2–4              | 33 <span> </span> %   | R   | 51–165        |           |          | ?   | ?      | ?                  | ?   | Het       | 1–3       | ?        | 1–10      | 7–11        | B(1–3)            | ?    | ?Eoc          |
| <i>Paraapocynaceoxylon barghoorni</i> Wheeler, Lee and Matten (Wheeler et al. 1987)                                          | D   | ND | 2–5              | 55 <span> </span> %   | ?   | 90–122–175    |           |          | Si  | 8–12   | 290–430–650        | ?   | Hom (Het) | 1–3       | 2–23     | 1–2       | 9–13        | B(1–2), SP        | 8–10 | uCre          |
| <i>Parahancornioxylon piptadiensis</i> (Lutz) Moya and Brea (Moya et al. 2019)                                               | D   | ND | 2–3(5)           | 44 <span> </span> %   | R   | 28–83–134     |           |          | Si  | 4–6.5  | 26–65–133          | ?   | Het       | 1–3       | 4–23     | ?         | 7–13        | DA, SP, C         | 4–7  | Plio          |
| <i>Tabernaemontana moralesii</i> Woodcock, Meyer and Prado (Woodcock et al. 2017)                                            | D   | ND | up to 10(13)     | ?                     | R   | 54            |           |          | Si  | 5      | 444                | ?   | ?         | 1–2       | 1–7      | ?         | 5           | S                 | ?    | Eoc           |
| Rubiaceae                                                                                                                    |     |    |                  |                       |     |               |           |          |     |        |                    |     |           |           |          |           |             |                   |      |               |
| <i>Calycophyllum plengei</i> Woodcock, Meyer and Prado (Woodcock et al. 2019)                                                | D   | R? | up to 16         |                       | R   | 42            |           |          | Si  | 4      | 317                | ?   | Het       | 1(2)–3(4) | ?        | 1–6(7)    | 5           | SP                | 2–7  | Eoc           |
| <i>Canthiumoxylon neyveliensis</i> Agarwal (Agarwal 1992)                                                                    | D   | ND | 2                | > 70%                 | ?   | 50–100        |           |          | Si  | ?      | 90–300             | ?   | Het       | 1–3(4)    | 3–25     | 1–3       | ?           | D–DA, B(1-2), SP  | ?    | ?             |
| cf. <i>Rubioxylon vincenti</i> (Lemoigne 1978)                                                                               | SR  | ND | 2–5 or even more |                       | ?   | 120–150       |           |          | ?   | ?      | ?                  | ?   | Het       | 1(2)      | 'short'  | ?         | 10–12       | D, DA–B, M, V     | ?    | ?Mio/Plio/Qua |
| <i>Grangeonixylon apocynorubioides</i> Privé-Gill (Privé-Gill 1983)                                                          | D   | ND | ?                | 97 <span> </span> %   | P–R | 30–62–85      |           |          | Si  | (2)3–7 | 200–500            | ?   | Het       | 1–4(5)    | 9–30     | 1–3(–5)   | 6–10        | D, DA             | ?    | ?Oli          |
| <i>Grangeonixylon danguese</i> Sakala, Privé-Gill and Koeniguer (Sakala et al. 1999)                                         | D   | ND | ?                | 100 <span> </span> %  | R   | 18–80/36–142* |           |          | Si  | 2–4    | 80–656/165–750*    | ?   | Het       | 1–3/2–4*  | 3–33     | 1–(8)     | 17–20/8–11* | D, DA, V          | ?    | Eoc           |
| <i>Mitragynaxylon gevinii</i> Gevin, Koeniguer and Lemoigne (Gevin et al. 1971)                                              | D   | R  | 2–3(4–8)         | 5 <span> </span> %    | P–R | 90–160(190)   |           |          | Si  | 6 x 4  | (300)400–500(600)  | ?   | Het       | (1)–2(3)  | ?        | up to 7?  | (6)9–11(13) | D, DA–B(2–3)      | ?    | Oli/Mio       |
| <i>Rubioxylon naucleoides</i> Hofmann (Hofmann 1952)                                                                         | D   | ND | 0                | ?100 <span> </span> % | ?   | ?             |           |          | ?Sc | ?      | ?                  | ?   | Het       | 1–2       | 8-16     | ?         | ?           | B(1), SP–V        | ?    | Oli           |
| <i>Rubioxylon vincenti</i> Koeniguer (Koeniguer 1975)                                                                        | SR  | ND | 2–12             | 10 <span> </span> %   | R   |               | 80–150    | 60–140   | Si  | 5      | 250–400 (and more) | ?   | Het       | 1–2       | 2–25     | ? 1–2     | 15–20       | D, DA–B(2–3), SP  | ?    | ?Mio/Plio/Qua |
| Ebenaceae                                                                                                                    |     |    |                  |                       |     |               |           |          |     |        |                    |     |           |           |          |           |             |                   |      |               |
| <i>Ebenoxylon aegyptiacum</i> Kräusel (Kräusel 1939)                                                                         | D   | ND | 2–8              | ?                     | R   | 34–100        |           |          | Si  | ?      | 240–500            | P   | ?         | 1–(2)     | 6–20     | ?         | ?           | DA–B, SP          | ?    | Oli/Mio       |
| <i>Ebenoxylon bavaricum</i> Selmeier (Selmeier 1976)                                                                         | D   | ND | 2–4              | 82 <span> </span> %   | R   |               | 106–173   | 40–93    | Si  | 4      | 79–239             | P   | Het       | 1–2       | 4–33     | ?         | 5–7         | B(1–2), SP        | ?    | uMio          |
| <i>Ebenoxylon boreale</i> Platen (Platen 1908)                                                                               | ?   | ?  | up to 4          | ?                     | ?   | up to 90      |           |          | Si  | ?      | ?                  | ?   | ?         | 1–2       | ?        | ?         | ?           | B(1), V           | ?    | ?Oli          |
| <i>Ebenoxylon deccanensis</i> Trivedi and Srivastava (Trivedi and Srivastava 1982)                                           | D   | ND | 2                | ?                     | R   | 75–195        |           |          | Si  | 4–5    | 120–474            | ?   | Hom       | (1)2–3(4) | 5–35     | -         | 16–21       | B(1), SP–V        | ?    | Ter           |
| <i>Ebenoxylon diospiroides</i> (Felix) emend. Müller-Stoll and Mädél-Angeliewa (Müller-Stoll and Mädél-Angeliewa 1984)       | D   | ND | 2–(3)            | ?                     | R   | 75–185        |           |          | Si  | 6–10   | ?                  | P   | Het       | 1–(2)     | 4–31     | 1         | 3–7         | B(1–2), SP        | ?    | uCre/Ter      |
| <i>Ebenoxylon ebenoides</i> (Schenk) Edwards (Schenk 1880; Kräusel 1939)                                                     | D   | ND | 2–6              | ?                     | R   | 30–70         |           |          | ?   | ?      | ?                  | P   | ?         | 1–(2)     | 4–25     | ?         | ?           | D                 | ?    | uCre          |
| <i>Ebenoxylon indicum</i> Gosh and Kazmi (Gosh and Kazmi 1958)                                                               | D   | ND | 2–3              | ?                     | R   | 82–225        |           |          | Si  | 5–6.5  | ?                  | A   | Het       | 1–(2)     | 6–22     | ?         | 16          | D–DA–B(1), SP–V   | ?    | Ter           |
| <i>Ebenoxylon karticherrense</i> Prakash and Tripathi (Prakash and Tripathi 1969)                                            | D   | ND | 2–3(5)           | ?                     | R   | 80–180        |           |          | Si  | 5–6    | 100–600            | P   | Het       | 1–3       | 3–30     | ?         | 15–20       | DA–B(1–2), SP     | 5–7  | uMio          |
| <i>Ebenoxylon mohgaoense</i> Chitaley and Patil (Chitaley and Patil 1972)                                                    | D   | ND | 2–5(10)          | ?                     | R   | 38–62         |           |          | Si  | 4–5    | 200–250            | ?   | Het       | 1–2       | 10–20    | ?         | 16–20       | D, V              | ?    | Ter           |
| <i>Ebenoxylon obliquiporosum</i> Awasthi and Ahuja (Awasthi and Ahuja 1982)                                                  | D   | R  | 2–3(6)           | ?                     | ?   | 120–180       |           |          | Si  | 5–8    | up to 648          | ?   | Het       | 1–(2)     | 7–22     | 1–3       | 20–22       | B(1), SP/V?       | ?    | Neo           |
| <i>Ebenoxylon palaeocandoleana</i> Prasad (Prasad 1993)                                                                      | D   | ND | 2–4              | ?                     | R   | 105–225       |           |          | Si  | 4–6    | 350–355            | P   | Het       | 1–(2)     | 6–25     | ?         | ?           | B(1–2), SP        | ?    | mMio          |
| <i>Ebenoxylon speciosum</i> Platen (Platen 1908)                                                                             | ?   | ?  | 'short'          | ?                     | ?   | 65            |           |          | Si  | ?      | ?                  | ?   | Het       | ?         | up to 24 | ?         | ?           | B(1), SP          | ?    | Ter           |
| <i>Ebenoxylon tenax</i> Beck (Beck 1886)                                                                                     | D   | ND | 2–3              | ?                     | R   | 70            |           |          | ?   | ?      | ?                  | ?   | ?         | 1–2       | up to 25 | ?         | ?           | DA–B(1–3), V      | ?    | Oli/Mio       |
| <i>Eudiospyroxylon multiradiatum</i> (Felix) Müller-Stoll and Mädél-Angeliewa (Müller-Stoll and Mädél-Angeliewa 1984)        | D   | ND | 2–4(5)           | ?                     | R   | 40–110        |           |          | Si  | 3–5    | 250–350            | ?   | Het       | 1–2(3)    | 5–17     | ?         | 14–19       | B(1–4), SP        | ?    | ?Ter          |
| <i>Eudiospyroxylon washingtonianum</i> (Prakash and Barghoorn) Müller-Stoll and Mädél-Angeliewa (Prakash and Barghoorn 1961) | SR  | ND | 2–4              | ?                     | R   | 40–146–240    |           |          | Si  | 3–5    | 190–310            | P   | Hom–Het   | 1–2       | 2–18     | -         | ?           | DA–B(1–3), M, ?SP | ?    | iMio          |
| <i>Euebenoxylon arcotense</i> (Awasthi) Süss (Awasthi 1969)                                                                  | D   | ND | 2–3              | ?                     | R   | 32–160        |           |          | Si  | 3–4    | 90–630             | A   | Het       | 1–(2)     | 4–40     | 1–2       | 13–18       | B(1), SP          | ?    | ?Mio          |
| <i>Euebenoxylon brunswicense</i> Gottwald (Gottwald 1992)                                                                    | D   | ND | up to 6          | ?                     | R   | up to 115     |           |          | Si  | 3–4    | ?                  | ?   | Het       | 1–2(3)    | ?        | 1–3       | ?           | B(–3)             | ?    | uEoc          |
| <i>Euebenoxylon hofmannae</i> (Greguss) Süss (Greguss 1956)                                                                  | D   | ND | 2–4              | ?                     | R   | ?             |           |          | ?   | ?      | ?                  | ?   | Het       | 2         | 8–10     | ?         | ?           | B(1–2)            | ?    | Oli           |
| <i>Euebenoxylon knolii</i> (Hofmann) Süss (Hofmann 1944)                                                                     | D   | ND | 2–?              | ?                     | R   | ?             |           |          | Si  | ?      | ?                  | ?   | Het       | 1–2       | up to 20 | 'several' | ?           | B(1–2), SP–V      | ?    | Oli           |
| <i>Euebenoxylon miocenicum</i> (Prakash) Süss (Prakash 1976)                                                                 | D   | ND | 2–4(6)           | ?                     | R   | 45–120        |           |          | Si  | 3–5    | 150–375            | ?   | Het       | 1–(2)     | 4–17     | ?         | 16–24       | B(1–2), SP        | ?    | Mio           |
| <i>Euebenoxylon polycrystallum</i> Gottwald (Gottwald 1997)                                                                  | D   | ND | up to 4          | < 30 <span> </span> % | R   | 55–68–84      |           |          | Si  | 3–4    | ?                  | A   | Het       | 1–2(3)    | ?        | ?         | ?           | B(1)              | ?    | Mio           |
| <i>Euebenoxylon saharicum</i> Süss (Süss 1987)                                                                               | D   | ND | 2                | ?                     | R   | 80–185        |           |          | Si  | 3–6    | ?                  | A   | Hom       | 1–2       | 4–40     | -         | 8–16        | B(1–4), V         | ?    | Plg           |
| <i>Euebenoxylon siwalicus</i> (Prakash) Süss (Prakash 1981)                                                                  | D   | ND | 2–4              | ?                     | R   | 64–128        |           |          | Si  | 4–6    | 112–480            | ?   | Het       | 1–2(3)    | 3–18     | 1–10      | 7–12        | D–DA, B(1–2), SP  | ?    | Mio           |
| <i>Irrawadioxylon burmense</i> Gupta (Gupta 1936)                                                                            | D   | ND | 'present'        | ?                     | R   | ?             |           |          | ?   | ?      | ?                  | P   | ?         | 1–4       | 2–30     | ?         | ?           | B(?1)             | ?    | Ter           |
| <i>Sjogrenia crystallophora</i> Felix emend. Jarmolenko (Jarmolenko 1941)                                                    | SR  | ND | ?                | ?                     | R   | up to 90      | up to 280 | up to 80 | Si  | 7.5–9  | 500                | P   | Het       | 1–4       | ?        | 1–9       | ?           | B(1–2), V         | ?    | ?Oli/Mio      |
